# Supplementary material for: Robust and generalizable embryo selection based on artificial intelligence and time-lapse image sequences
Source: PubMed Central journal article supplement (PMC8809568; doi:10.1371/journal.pone.0262661), 2022-02-02
Supplement: pone.0262661.s001.pdf [file pone.0262661.s001.pdf]

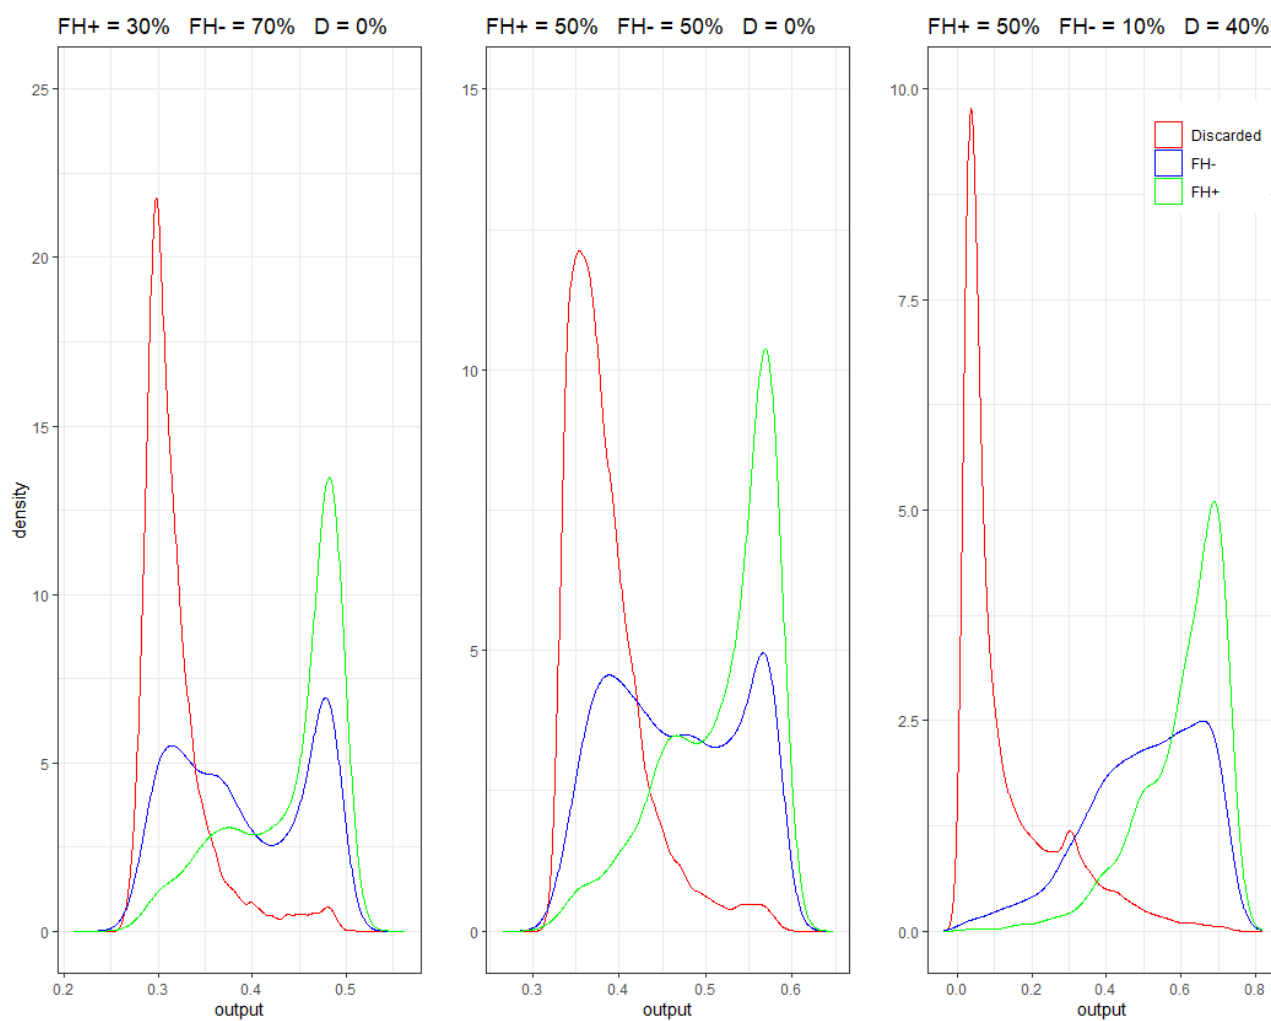

**Supplementary Figure 1.** Density plots of the FH+ (green), FH- (blue) and discarded (red) embryos evaluated on a single validation fold for the three different sampling strategies. The left panel shows the distribution of the raw sigmoid output from a model that was trained only on KID embryos. In the mid panel a model was trained only on KID embryos but with oversampling of FH+ embryos. In the right panel a model was trained using oversampling of FH+ and including discarded embryos.
