# Supplementary material for: Robust and generalizable embryo selection based on artificial intelligence and time-lapse image sequences
Source: PubMed Central journal article supplement (PMC8809568; doi:10.1371/journal.pone.0262661), 2022-02-02
Supplement: pone.0262661.s002.pdf [file pone.0262661.s002.pdf]

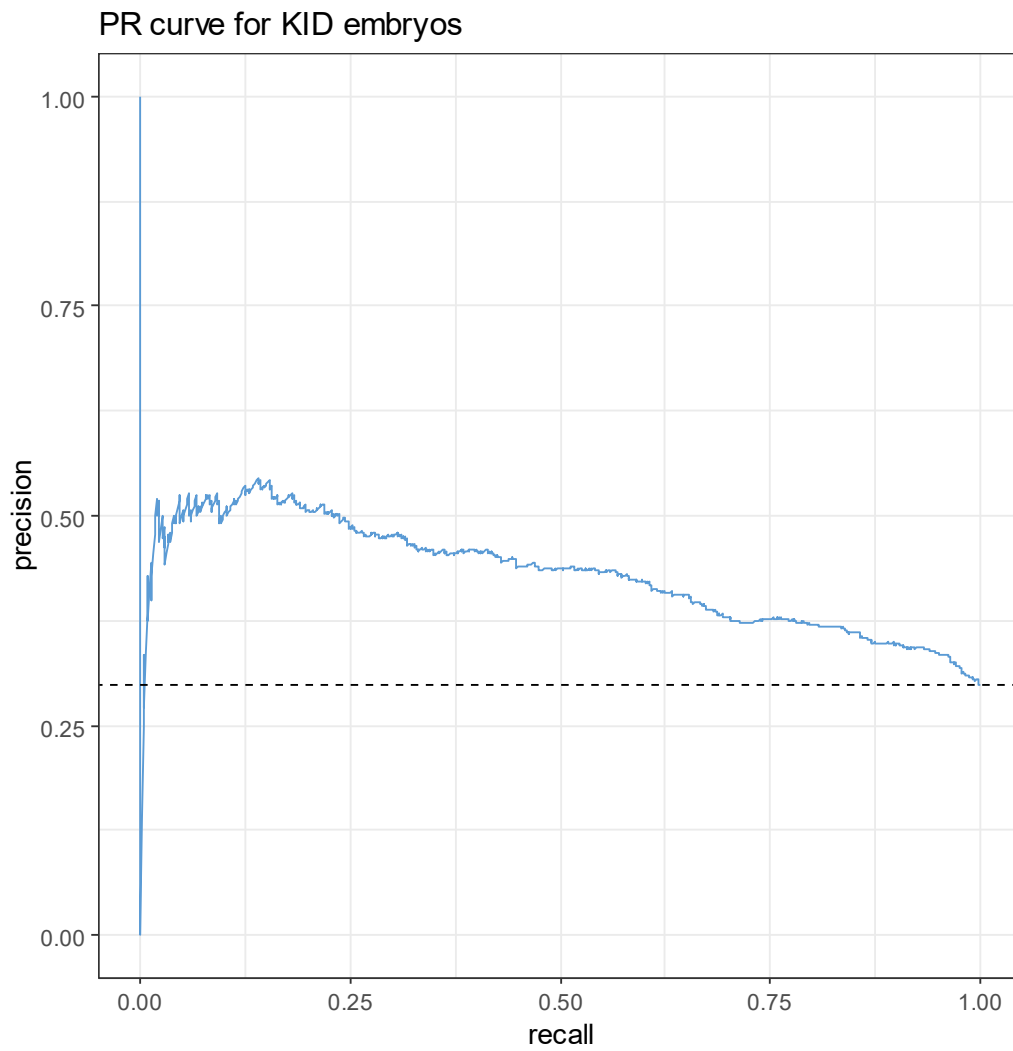

**Supplementary Figure 2.** Precision/recall curve for KID embryos in the test data set ( $n = 2,212$ ) based on iDAScore predictions. The dotted line shows the prevalence of FH+ in the data set.
